# Supplementary material for: Reaction mechanisms of C(3PJ) and C+(2PJ) with benzene in the interstellar medium from quantum mechanical molecular dynamics simulations
Source: Royal Society of Chemistry journal article supplement (doi:10.1039/d0cp04542j), 2021-01-01
Supplement: d0cp04542j2.pdf [file d0cp04542j2.pdf]

## Reaction mechanisms of C(3PJ) and C+ ( 2PJ) with benzene in the interstellar medium from quantum mechanical molecular dynamics simulations

(Mohammad Ebrahim Izadi, Kristof M. Bal, Ali Maghari and Erik C. Neyts)

**Table S1.** Mechanisms and products observed over first 30 simulations, the ones reported in the manuscript and 30 new simulations with the same settings except the initial random velocities/positions of benzene. It should be noted that all orientations are also included, and they are shown using different colors so that the red represent face collisions, blue edge in-plane and black edge out-of-plane.

| Extra 30 simulation |                               |                                    | Original simulations |                               |                                    |
|---------------------|-------------------------------|------------------------------------|----------------------|-------------------------------|------------------------------------|
| ID                  | Mechanism                     | Product                            | ID                   | Mechanism                     | Product                            |
| 1                   | Insertion between C-C bond    | C <sub>7</sub> H <sub>6</sub>      | 1                    | Insertion between C-C bond    | C <sub>7</sub> H <sub>6</sub>      |
| 2                   | Insertion between C-C bond    | C <sub>7</sub> H <sub>6</sub>      | 2                    | Insertion between C-C bond    | C <sub>7</sub> H <sub>6</sub>      |
| 3                   | Insertion between C-C bond    | C <sub>7</sub> H <sub>6</sub>      | 3                    | Insertion between C-C bond    | C <sub>7</sub> H <sub>6</sub>      |
| 4                   | Insertion between C-C bond    | C <sub>7</sub> H <sub>6</sub>      | 4                    | Insertion between C-C bond    | C <sub>7</sub> H <sub>6</sub>      |
| 5                   | C eject a CH out of the ring  | C <sub>6</sub> H <sub>5</sub> -C-H | 5                    | Insertion between C-C bond    | C <sub>7</sub> H <sub>6</sub>      |
| 6                   | Insertion between C-C bond    | C <sub>7</sub> H <sub>6</sub>      | 6                    | Insertion between C-C bond    | C <sub>7</sub> H <sub>6</sub>      |
| 7                   | Insertion between C-C bond    | C <sub>7</sub> H <sub>6</sub>      | 7                    | C eject a CH out of the ring  | C <sub>6</sub> H <sub>5</sub> -C-H |
| 8                   | Insertion between C-C bond    | C <sub>7</sub> H <sub>6</sub>      | 8                    | Insertion between C-C bond    | C <sub>7</sub> H <sub>6</sub>      |
| 9                   | Insertion between C-C bond    | C <sub>7</sub> H <sub>6</sub>      | 9                    | Insertion between C-C bond    | C <sub>7</sub> H <sub>6</sub>      |
| 10                  | Insertion between C-C bond    | C <sub>7</sub> H <sub>6</sub>      | 10                   | Insertion between C-C bond    | C <sub>7</sub> H <sub>6</sub>      |
| 11                  | Insertion between C-H bond    | C <sub>6</sub> H <sub>5</sub> -C-H | 11                   | Insertion between C-H bond    | C <sub>6</sub> H <sub>5</sub> -C-H |
| 12                  | Insertion between C-H bond    | C <sub>6</sub> H <sub>5</sub> -C-H | 12                   | Insertion between C-C bond    | C <sub>7</sub> H <sub>6</sub>      |
| 13                  | Insertion between C-C bond    | C <sub>7</sub> H <sub>6</sub>      | 13                   | C eject a CH out of the ring  | C <sub>6</sub> H <sub>5</sub> -C-H |
| 14                  | Insertion between C-H bond    | C <sub>6</sub> H <sub>5</sub> -C-H | 14                   | Insertion between C-H bond    | C <sub>6</sub> H <sub>5</sub> -C-H |
| 15                  | C eject a CH out of the ring  | C <sub>6</sub> H <sub>5</sub> -C-H | 15                   | Insertion between C-H bond    | C <sub>6</sub> H <sub>5</sub> -C-H |
| 16                  | Insertion between C-H bond    | C <sub>6</sub> H <sub>5</sub> -C-H | 16                   | Insertion between C-H bond    | C <sub>6</sub> H <sub>5</sub> -C-H |
| 17                  | Insertion between C-H bond    | C <sub>6</sub> H <sub>5</sub> -C-H | 17                   | Insertion between C-H bond    | C <sub>6</sub> H <sub>5</sub> -C-H |
| 18                  | Insertion between C-H bond    | C <sub>6</sub> H <sub>5</sub> -C-H | 18                   | Insertion between C-H bond    | C <sub>6</sub> H <sub>5</sub> -C-H |
| 19                  | Insertion between C-H bond    | C <sub>6</sub> H <sub>5</sub> -C-H | 19                   | Insertion between C-H bond    | C <sub>6</sub> H <sub>5</sub> -C-H |
| 20                  | Insertion between C-H bond    | C <sub>6</sub> H <sub>5</sub> -C-H | 20                   | Insertion between C-H bond    | C <sub>6</sub> H <sub>5</sub> -C-H |
| 21                  | Insertion between C-H bond    | C <sub>6</sub> H <sub>5</sub> -C-H | 21                   | C eject a CH out of the plane | C <sub>7</sub> H <sub>6</sub>      |
| 22                  | Insertion between C-C bond    | C <sub>7</sub> H <sub>6</sub>      | 22                   | Insertion between C-C bond    | C <sub>7</sub> H <sub>6</sub>      |
| 23                  | C eject a CH out of the plane | C <sub>7</sub> H <sub>6</sub>      | 23                   | Insertion between C-C bond    | C <sub>7</sub> H <sub>6</sub>      |
| 24                  | Insertion between C-H bond    | C <sub>6</sub> H <sub>5</sub> -C-H | 24                   | Insertion between C-H bond    | C <sub>6</sub> H <sub>5</sub> -C-H |
| 25                  | Insertion between C-C bond    | C <sub>7</sub> H <sub>6</sub>      | 25                   | Insertion between C-H bond    | C <sub>6</sub> H <sub>5</sub> -C-H |
| 26                  | Insertion between C-H bond    | C <sub>6</sub> H <sub>5</sub> -C-H | 26                   | Insertion between C-H bond    | C <sub>6</sub> H <sub>5</sub> -C-H |
| 27                  | Insertion between C-H bond    | C <sub>6</sub> H <sub>5</sub> -C-H | 27                   | Insertion between C-H bond    | C <sub>6</sub> H <sub>5</sub> -C-H |
| 28                  | Insertion between C-H bond    | C <sub>6</sub> H <sub>5</sub> -C-H | 28                   | Insertion between C-H bond    | C <sub>6</sub> H <sub>5</sub> -C-H |
| 29                  | Insertion between C-C bond    | C <sub>7</sub> H <sub>6</sub>      | 29                   | Insertion between C-H bond    | C <sub>6</sub> H <sub>5</sub> -C-H |
| 30                  | Insertion between C-H bond    | C <sub>6</sub> H <sub>5</sub> -C-H | 30                   | Insertion between C-C bond    | C <sub>7</sub> H <sub>6</sub>      |
